# Supplementary material
Source: MDPI journal article supplement (https://www.mdpi.com/2073-4441/15/10/1950)
Supplement: s1 [file s1]

**Table S1.** Statistical values of major and minor ions measured in surface and groundwater from Taxco-Cocula hydrological sub-basin.

| Water Source                      | Season | Statistical values | $HCO_3^-$    | $SO_4^{2-}$ | $Cl^-$      | $NO_3^-$   | $Ca^{2+}$    | $Na^+$      | $K^+$      | $Mg^{2+}$   | $SiO_2$     |
|-----------------------------------|--------|--------------------|--------------|-------------|-------------|------------|--------------|-------------|------------|-------------|-------------|
| mg/L                              |        |                    |              |             |             |            |              |             |            |             |             |
| Surface water (Rivers or streams) | Dry    | Min                | 129.3        | 10.0        | 3.3         | 1.1        | 27.9         | 4.1         | 0.9        | 1.6         | 6.8         |
|                                   |        | Max                | 412.4        | 2600.0      | 90.0        | 125.0      | 183.5        | 79.1        | 37.2       | 102.1       | 48.9        |
|                                   |        | <b>Median</b>      | <b>197.6</b> | <b>61.5</b> | <b>17.5</b> | <b>7.1</b> | <b>109.5</b> | <b>16.6</b> | <b>4.0</b> | <b>14.7</b> | <b>24.2</b> |
|                                   |        | P10                | 174.5        | 27.5        | 10.8        | 2.6        | 72.5         | 11.1        | 36.3       | 11.1        | 21.5        |
|                                   |        | P90                | 234.3        | 163.0       | 24.2        | 19.4       | 147.5        | 25.8        | 9.7        | 18.4        | 33.1        |
|                                   |        | IQR                | 59.8         | 135.5       | 13.4        | 16.8       | 75.0         | 14.8        | 7.4        | 7.3         | 11.6        |
|                                   | Rainy  | Min                | 109.8        | 10.0        | 2.0         | 0.5        | 23.8         | 2.1         | 0.3        | 1.7         | 7.6         |
|                                   |        | Max                | 383.1        | 460.0       | 53.0        | 26.7       | 170.1        | 49.4        | 21.9       | 19.1        | 47.4        |
|                                   |        | <b>Median</b>      | <b>201.3</b> | <b>48.0</b> | <b>10.0</b> | <b>9.5</b> | <b>97.7</b>  | <b>9.3</b>  | <b>2.2</b> | <b>10.2</b> | <b>25.3</b> |
|                                   |        | P10                | 164.7        | 29.5        | 4.5         | 5.2        | 69.7         | 6.4         | 1.5        | 7.8         | 18.9        |
|                                   |        | P90                | 230.6        | 74.0        | 15.0        | 14.4       | 128.2        | 16.9        | 4.6        | 12.6        | 37.3        |
|                                   |        | IQR                | 65.9         | 44.5        | 10.5        | 9.2        | 58.5         | 10.5        | 3.1        | 4.9         | 18.4        |
| Groundwater (Springs)             | Dry    | Min                | 29.3         | 1.0         | 1.7         | 0.3        | 5.0          | 1.1         | 0.2        | 0.2         | 9.5         |
|                                   |        | Max                | 621.2        | 1000.0      | 54.2        | 57.7       | 352.2        | 17.9        | 3.2        | 76.4        | 74.0        |
|                                   |        | <b>Median</b>      | <b>268.4</b> | <b>18.5</b> | <b>5.4</b>  | <b>1.4</b> | <b>112.2</b> | <b>5.5</b>  | <b>0.9</b> | <b>4.2</b>  | <b>18.8</b> |
|                                   |        | P10                | 229.4        | 5.5         | 3.3         | 1.0        | 59.0         | 2.8         | 0.8        | 2.2         | 12.6        |
|                                   |        | P90                | 408.9        | 94.0        | 26.7        | 7.2        | 173.3        | 13.1        | 2.0        | 17.7        | 28.0        |
|                                   |        | IQR                | 179.5        | 88.5        | 23.4        | 6.2        | 114.3        | 10.3        | 1.3        | 15.5        | 15.4        |
|                                   | Rainy  | Min                | 29.3         | 1.0         | 2.0         | 0.1        | 4.9          | 1.0         | 0.1        | 0.2         | 4.0         |
|                                   |        | Max                | 407.5        | 900.0       | 31.0        | 39.1       | 390.5        | 18.3        | 4.3        | 72.9        | 70.0        |
|                                   |        | <b>Median</b>      | <b>261.1</b> | <b>15.0</b> | <b>5.0</b>  | <b>2.6</b> | <b>83.9</b>  | <b>4.9</b>  | <b>0.9</b> | <b>3.9</b>  | <b>17.2</b> |
|                                   |        | P10                | 179.8        | 3.0         | 3.0         | 1.4        | 48.3         | 2.3         | 0.4        | 1.2         | 9.5         |
|                                   |        | P90                | 292.5        | 64.0        | 26.0        | 10.2       | 130.4        | 13.7        | 2.2        | 14.1        | 34.9        |
|                                   |        | IQR                | 112.8        | 61.0        | 23.0        | 8.9        | 82.1         | 11.4        | 1.8        | 12.9        | 25.4        |

Min: Minimum; Max: Maximum; P10: 10th percentile; P90: 90th percentile; IQR: Interquartile range

**Table S2.** Statistical values of heavy metals measured in surface and groundwater from Taxco-Cocula hydrological sub-basin.

| Water Source                      | Season | Statistical values | Al           | As           | Ba           | Cd           | Cu           | Fe           | Mn           | Pb           | Sr           | Zn           |
|-----------------------------------|--------|--------------------|--------------|--------------|--------------|--------------|--------------|--------------|--------------|--------------|--------------|--------------|
| mg/L                              |        |                    |              |              |              |              |              |              |              |              |              |              |
| Surface water<br>(Rivers/streams) | Dry    | Min                | 0.030        | 0.010        | 0.020        | 0.010        | 0.080        | 0.030        | 0.030        | 0.010        | 0.060        | 0.050        |
|                                   |        | Max                | 28.630       | 0.600        | 0.180        | 1.780        | 1.050        | 68.270       | 21.470       | 0.020        | 0.740        | 208.800      |
|                                   |        | <b>Median</b>      | <b>0.060</b> | <b>0.015</b> | <b>0.050</b> | <b>0.085</b> | <b>0.135</b> | <b>0.085</b> | <b>0.670</b> | <b>0.015</b> | <b>0.280</b> | <b>0.200</b> |
|                                   |        | P10                | 0.035        | 0.010        | 0.035        | 0.015        | 0.100        | 0.050        | 0.060        | 0.010        | 0.200        | 0.080        |
|                                   |        | P90                | 1.105        | 0.025        | 0.065        | 0.105        | 0.600        | 0.285        | 1.580        | 0.020        | 0.370        | 1.200        |
|                                   |        | IQR                | 1.070        | 0.015        | 0.030        | 0.090        | 0.500        | 0.235        | 1.520        | 0.010        | 0.170        | 1.120        |
|                                   | Rainy  | Min                | 0.050        | 0.010        | 0.030        | 0.010        | ND           | 0.040        | 0.030        | 0.030        | 0.030        | 0.020        |
|                                   |        | Max                | 2.150        | 0.090        | 0.230        | 0.020        | ND           | 3.730        | 0.590        | 0.050        | 0.980        | 1.410        |
|                                   |        | <b>Median</b>      | <b>0.265</b> | <b>0.020</b> | <b>0.045</b> | <b>0.015</b> | <b>ND</b>    | <b>0.330</b> | <b>0.050</b> | <b>0.040</b> | <b>0.230</b> | <b>0.050</b> |
|                                   |        | P10                | 0.120        | 0.010        | 0.040        | 0.010        | ND           | 0.160        | 0.030        | 0.030        | 0.185        | 0.030        |
|                                   |        | P90                | 0.520        | 0.030        | 0.050        | 0.020        | ND           | 0.645        | 0.230        | 0.050        | 0.305        | 0.110        |
|                                   |        | IQR                | 0.400        | 0.020        | 0.010        | 0.010        | ND           | 0.485        | 0.200        | 0.020        | 0.120        | 0.080        |
| Groundwater<br>(Springs)          | Dry    | Min                | 0.030        | 0.010        | 0.030        | ND           | ND           | 0.030        | 0.030        | ND           | 0.030        | 0.030        |
|                                   |        | Max                | 0.370        | 0.080        | 0.100        | ND           | ND           | 0.130        | 0.030        | ND           | 2.520        | 0.230        |
|                                   |        | <b>Median</b>      | <b>0.120</b> | <b>0.045</b> | <b>0.040</b> | <b>ND</b>    | <b>ND</b>    | <b>0.060</b> | <b>0.030</b> | <b>ND</b>    | <b>0.130</b> | <b>0.110</b> |
|                                   |        | P10                | 0.030        | 0.010        | 0.030        | ND           | ND           | 0.050        | 0.030        | ND           | 0.070        | 0.070        |
|                                   |        | P90                | 0.150        | 0.080        | 0.050        | ND           | ND           | 0.100        | 0.030        | ND           | 0.530        | 0.130        |
|                                   |        | IQR                | 0.120        | 0.070        | 0.020        | ND           | ND           | 0.050        | 0.000        | ND           | 0.460        | 0.060        |
|                                   | Rainy  | Min                | 0.030        | 0.150        | 0.030        | ND           | ND           | 0.020        | 0.030        | ND           | 0.030        | 0.030        |
|                                   |        | Max                | 0.250        | 0.150        | 0.070        | ND           | ND           | 0.250        | 0.030        | ND           | 2.800        | 0.060        |
|                                   |        | <b>Median</b>      | <b>0.100</b> | <b>0.150</b> | <b>0.050</b> | <b>ND</b>    | <b>ND</b>    | <b>0.060</b> | <b>0.030</b> | <b>ND</b>    | <b>0.060</b> | <b>0.045</b> |
|                                   |        | P10                | 0.060        | 0.150        | 0.040        | ND           | ND           | 0.045        | 0.030        | ND           | 0.040        | 0.030        |
|                                   |        | P90                | 0.190        | 0.150        | 0.055        | ND           | ND           | 0.135        | 0.030        | ND           | 0.255        | 0.060        |
|                                   |        | IQR                | 0.130        | 0.000        | 0.015        | ND           | ND           | 0.090        | 0.000        | ND           | 0.215        | 0.030        |

Min: Minimum; Max: Maximum; P10: 10th percentile; P90: 90th percentile; IQR: Interquartile range; ND: No detected

**Table S3.** Multivariate analysis by using Principal Component Analysis.

| <b>Component</b>              | <b>Factor 1</b> | <b>Factor 2</b> | <b>Factor 3</b> | <b>Factor 4</b> |
|-------------------------------|-----------------|-----------------|-----------------|-----------------|
| <b><math>HCO_3^-</math></b>   | -0.57           | <b>0.6</b>      | -0.15           | 0.05            |
| <b><math>SO_4^{2-}</math></b> | <b>0.99</b>     | -0.03           | 0               | 0.03            |
| <b><math>Cl^-</math></b>      | -0.12           | <b>0.97</b>     | -0.05           | 0.12            |
| <b><math>NO_3^-</math></b>    | <b>0.6</b>      | <b>0.77</b>     | -0.15           | -0.02           |
| <b><math>Ca^{2+}</math></b>   | 0.24            | -0.05           | <b>0.1</b>      | <b>0.92</b>     |
| <b><math>Na^+</math></b>      | 0.07            | <b>0.96</b>     | 0.08            | -0.05           |
| <b><math>K^+</math></b>       | -0.07           | <b>0.85</b>     | 0.33            | 0.14            |
| <b><math>Mg^{2+}</math></b>   | <b>0.95</b>     | 0.02            | 0.14            | 0.22            |
| <b><math>SiO_2</math></b>     | -0.12           | <b>0.47</b>     | -0.25           | <b>0.73</b>     |
| <b>Al</b>                     | <b>1</b>        | -0.03           | 0.01            | 0               |
| <b>As</b>                     | <b>0.99</b>     | -0.04           | -0.02           | -0.01           |
| <b>Ba</b>                     | -0.15           | 0.07            | <b>0.97</b>     | -0.14           |
| <b>Cd</b>                     | <b>1</b>        | -0.04           | -0.01           | 0               |
| <b>Cu</b>                     | <b>0.95</b>     | 0.06            | 0.05            | 0.13            |
| <b>Fe</b>                     | <b>1</b>        | -0.03           | 0               | 0.02            |
| <b>Mn</b>                     | <b>1</b>        | 0               | -0.01           | 0.04            |
| <b>Pb</b>                     | <b>0.99</b>     | -0.03           | 0.01            | 0.03            |
| <b>Sr</b>                     | 0.2             | 0.04            | <b>0.96</b>     | 0.09            |
| <b>Zn</b>                     | <b>1</b>        | -0.03           | -0.01           | 0.01            |
| <b>Variance (%)</b>           | 55              | 20.5            | 11.2            | 7.1             |

**Table S4.** Diversity of chemical reactive phases in the surface water of Taxco-Cocula sub-basin in dry season.

| Sample               | Minerals  |         |        |            |          |        |        |       | Others                                                                                                                                                 |
|----------------------|-----------|---------|--------|------------|----------|--------|--------|-------|--------------------------------------------------------------------------------------------------------------------------------------------------------|
|                      | Aragonite | Calcite | Gypsum | Jarosite-K | Goethite | Quartz | Barite | ZnO   |                                                                                                                                                        |
| Taxco-Cocula River   |           |         |        |            |          |        |        |       |                                                                                                                                                        |
| S1                   | 0.99      | 1.14    | -1.59  | -4.25      | 8.13     | 0.72   | 0.05   | -1.48 | Ba <sub>3</sub> (AsO <sub>4</sub> ) <sub>2</sub> (8.84), AlOOH (1.94)                                                                                  |
| S2                   | ND        | ND      | -0.49  | -20.38     | -3.15    | 0.59   | 0.55   | -8.83 | CuFeO <sub>2</sub> (1.21), PbSO <sub>4</sub> (-2.10), CuO (-7.42), As <sub>2</sub> O <sub>3</sub> (-8.67), CdSO <sub>4</sub> (-7.75)                   |
| S3                   | ND        | 0.15    | -1.37  | 1.81       | 9.17     | 0.73   | 0.16   | -1.65 | Ba <sub>3</sub> (AsO <sub>4</sub> ) <sub>2</sub> (7.09), AlOOH (2.48), CdCO <sub>3</sub> (0.44), FeCO <sub>3</sub> (0.50)                              |
| S8                   | 0.85      | 1.00    | -1.81  | 1.24       | 9.74     | 0.97   | 0.46   | 0.44  | Ba <sub>3</sub> (AsO <sub>4</sub> ) <sub>2</sub> (9.70), AlOOH (3.71), CdCO <sub>3</sub> (0.87), CuO (0.03)                                            |
| S10                  | 0.79      | 0.94    | -1.10  | 0.86       | 9.83     | 0.91   | 0.44   | 0.73  | Ba <sub>3</sub> (AsO <sub>4</sub> ) <sub>2</sub> (10.27), AlOOH (1.88), CuFeO <sub>2</sub> (16.16), ZnCO <sub>3</sub> (0.57), MnCO <sub>3</sub> (0.60) |
| S11                  | 1.18      | 1.34    | -1.12  | -2.98      | 8.95     | 0.79   | 0.39   | 0.49  | Ba <sub>3</sub> (AsO <sub>4</sub> ) <sub>2</sub> (10.29), AlOOH (0.62), CdCO <sub>3</sub> (1.16), MnCO <sub>3</sub> (1.45)                             |
| S12                  | 1.41      | 1.56    | -1.12  | -6.80      | 7.89     | 0.56   | 0.23   | 0.23  | AlOOH (1.28), CdCO <sub>3</sub> (0.86), MnCO <sub>3</sub> (0.57), MgCO <sub>3</sub> (0.54)                                                             |
| S14                  | 1.77      | 1.92    | -1.39  | -11.31     | 7.14     | 0.42   | 0.08   | 0.26  | Ba <sub>3</sub> (AsO <sub>4</sub> ) <sub>2</sub> (11.57), CdCO <sub>3</sub> (0.98), MnCO <sub>3</sub> (1.01), MgCO <sub>3</sub> (0.84)                 |
| S16                  | 1.38      | 1.52    | -1.95  | -10.01     | 7.28     | 0.49   | -0.50  | -1.05 | Zn <sub>2</sub> SiO <sub>4</sub> (1.75), MgCO <sub>3</sub> (0.44), SrSO <sub>4</sub> (-2.90)                                                           |
| S22                  | 1.53      | 1.67    | -1.86  | -9.66      | 7.39     | 0.52   | ND     | -1.29 | Zn <sub>2</sub> SiO <sub>4</sub> (0.89), MgCO <sub>3</sub> (-0.12), FeCO <sub>3</sub> (-4.45)                                                          |
| S23                  | 1.56      | 1.70    | -1.84  | -10.61     | 7.11     | 0.51   | -0.41  | -1.23 | Zn <sub>2</sub> SiO <sub>4</sub> (1.40), MgCO <sub>3</sub> (0.58), kaolinite (1.43)                                                                    |
| Cacalotenango stream |           |         |        |            |          |        |        |       |                                                                                                                                                        |
| S4                   | 0.66      | 0.81    | -2.83  | -9.32      | 7.82     | 0.64   | -0.79  | -1.53 | Al(OH) <sub>3</sub> (0.71), Zn <sub>2</sub> SiO <sub>4</sub> (1.40), MgCO <sub>3</sub> (0.58), kaolinite (1.43)                                        |
| S5                   | 0.78      | 0.93    | -2.41  | -9.22      | 7.63     | 0.55   | -0.59  | -1.32 | Zn <sub>2</sub> SiO <sub>4</sub> (0.83), MgCO <sub>3</sub> (-0.56), FeCO <sub>3</sub> (-3.80)                                                          |
| S6                   | 1.04      | 1.19    | -1.76  | -6.70      | 8.05     | 0.88   | 0.03   | -1.00 | Zn <sub>2</sub> SiO <sub>4</sub> (1.95), MgCO <sub>3</sub> (-0.10), FeCO <sub>3</sub> (-3.17)                                                          |
| S7                   | 1.01      | 1.16    | -1.29  | -4.82      | 8.12     | 0.91   | 0.30   | -1.44 | AlOOH (0.35), Al(OH) <sub>3</sub> (0.95), MgCO <sub>3</sub> (-0.19)                                                                                    |
| Buenavista stream    |           |         |        |            |          |        |        |       |                                                                                                                                                        |
| S19                  | 0.69      | 0.84    | -1.17  | -2.14      | 8.17     | 0.93   | 0.60   | -1.17 | Ba <sub>3</sub> (AsO <sub>4</sub> ) <sub>2</sub> (8.80), AlOOH (0.06), MnCO <sub>3</sub> (0.94), Zn <sub>2</sub> SiO <sub>4</sub> (0.38)               |
| S17                  | 1.38      | 1.52    | -1.30  | -7.37      | 7.39     | 0.75   | ND     | -1.98 | FeCO <sub>3</sub> (-2.30), MgCO <sub>3</sub> (0.27), SrSO <sub>4</sub> (-2.23)                                                                         |
| S18                  | 0.61      | 0.76    | -1.41  | -5.28      | 7.31     | 0.77   | 0.09   | ND    | FeCO <sub>3</sub> (-1.90), MnCO <sub>3</sub> (-0.34), MgCO <sub>3</sub> (-0.45)                                                                        |
| S20                  | 0.57      | 0.72    | -1.90  | -4.22      | 8.24     | 0.16   | 0.42   | -1.09 | Zn <sub>2</sub> SiO <sub>4</sub> (0.94), MgCO <sub>3</sub> (-0.06), Al(OH) <sub>3</sub> (1.57)                                                         |
| S21                  | 1.35      | 1.49    | -1.93  | -10.35     | 7.11     | -0.11  | 0.37   | ND    | FeCO <sub>3</sub> (-5.34), MgCO <sub>3</sub> (0.57), AlOOH (-0.17)                                                                                     |

ND: No detected.

**Table S5.** Diversity of chemical reactive phases in the surface water of Taxco-Cocula sub-basin in rainy season.

| Sample               | Minerals  |         |        |            |          |        |        |       | Others                                                                                                                                                 |
|----------------------|-----------|---------|--------|------------|----------|--------|--------|-------|--------------------------------------------------------------------------------------------------------------------------------------------------------|
|                      | Aragonite | Calcite | Gypsum | Jarosite-K | Goethite | Quartz | Barite | ZnO   |                                                                                                                                                        |
| Taxco-Cocula River   |           |         |        |            |          |        |        |       |                                                                                                                                                        |
| S1                   | 0.99      | 1.14    | -1.59  | -4.25      | 8.13     | 0.72   | 0.05   | -1.48 | Zn <sub>2</sub> SiO <sub>4</sub> (1.50), MnCO <sub>3</sub> (0.20), Al(OH) <sub>3</sub> (1.59), AlOOH (2.81)                                            |
| S2                   | 1.23      | 1.37    | -0.83  | -2.79      | 8.69     | 0.36   | ND     | -0.30 | AlOOH (0.52), MgCO <sub>3</sub> (0.22), CdCO <sub>3</sub> (0.67)                                                                                       |
| S3                   | 0.72      | 0.86    | -1.51  | -2.73      | 9.03     | 0.89   | -0.40  | -0.60 | PbSO <sub>4</sub> (-3.84), Pb(OH) <sub>2</sub> (0.32), AlOOH (1.40), MnCO <sub>3</sub> (0.49)                                                          |
| S8                   | 0.77      | 0.92    | -1.60  | -1.45      | 9.39     | 0.87   | 0.01   | -0.67 | AlOOH (1.67), MgCO <sub>3</sub> (-0.32), Pb(OH) <sub>2</sub> (-0.65)                                                                                   |
| S10                  | 1.82      | 1.96    | -1.51  | -8.59      | 7.92     | 0.64   | -0.17  | -0.92 | CdCO <sub>3</sub> (0.93), ZnCO <sub>3</sub> (-2.05), MnCO <sub>3</sub> (0.22)                                                                          |
| S11                  | 1.72      | 1.86    | -1.79  | -10.13     | 7.59     | 0.55   | -0.37  | -1.49 | Zn <sub>2</sub> SiO <sub>4</sub> (0.55), MgCO <sub>3</sub> (0.51), AlOOH (1.13)                                                                        |
| S12                  | 1.76      | 1.90    | -1.80  | -11.29     | 7.44     | 0.33   | -1.32  | -1.26 | AlOOH (0.91), MgCO <sub>3</sub> (0.65), Zn <sub>2</sub> SiO <sub>4</sub> (0.80)                                                                        |
| S14                  | 1.72      | 1.86    | -1.86  | -10.76     | 7.53     | 0.41   | -0.43  | ND    | Al(OH) <sub>3</sub> (-0.23), MgCO <sub>3</sub> (0.60), AlOOH (-0.71)                                                                                   |
| S16                  | 1.52      | 1.66    | -1.90  | -7.82      | 8.21     | 0.54   | -0.60  | -1.19 | Zn <sub>2</sub> SiO <sub>4</sub> (1.11), MgCO <sub>3</sub> (0.43), Al(OH) <sub>3</sub> (0.65)                                                          |
| S22                  | 1.41      | 1.63    | -2.01  | -7.84      | 8.25     | 0.43   | -0.51  | -1.09 | Ba <sub>3</sub> (AsO <sub>4</sub> ) <sub>2</sub> (10.66), AlOOH (1.65), MgCO <sub>3</sub> (0.42), Zn <sub>2</sub> SiO <sub>4</sub> (1.18)              |
| S23                  | 1.50      | 1.64    | -1.93  | -7.83      | 8.18     | 0.38   | -0.38  | -1.49 | AlOOH (0.20), MgCO <sub>3</sub> (0.40), MnCO <sub>3</sub> (-0.11)                                                                                      |
| Cacalotenango stream |           |         |        |            |          |        |        |       |                                                                                                                                                        |
| S4                   | 1.27      | 1.41    | -2.64  | -11.15     | 7.71     | 0.64   | -0.80  | ND    | Al(OH) <sub>3</sub> (0.15), AlOOH (-0.41), MgCO <sub>3</sub> (-0.05)                                                                                   |
| S5                   | 1.25      | 1.39    | -2.51  | -13.57     | 7.05     | 0.18   | ND     | ND    | AlOOH (-1.06)                                                                                                                                          |
| S6                   | 1.71      | 1.86    | -1.84  | -11.03     | 7.59     | 0.71   | -0.14  | -0.61 | MnCO <sub>3</sub> (0.13), MgCO <sub>3</sub> (0.57), Al(OH) <sub>3</sub> (-0.16)                                                                        |
| S7                   | 1.76      | 1.91    | -1.66  | -9.75      | 7.68     | 0.71   | -0.14  | -1.01 | Ba <sub>3</sub> (AsO <sub>4</sub> ) <sub>2</sub> (11.59), MgCO <sub>3</sub> (0.64), AlOOH (0.97)                                                       |
| Buenavista stream    |           |         |        |            |          |        |        |       |                                                                                                                                                        |
| S19                  | 0.83      | 0.98    | -2.14  | -4.28      | 8.57     | 0.81   | -0.19  | ND    | Ba <sub>3</sub> (AsO <sub>4</sub> ) <sub>2</sub> (11.12), MnCO <sub>3</sub> (0.70), AlOOH (2.45), MgCO <sub>3</sub> (0.01)                             |
| S17                  | 1.67      | 1.78    | -1.57  | -9.68      | 7.22     | 0.77   | -0.04  | ND    | MgCO <sub>3</sub> (0.54), FeCO <sub>3</sub> (-4.49)                                                                                                    |
| S18                  | 1.69      | 1.73    | -1.69  | -10.42     | 7.10     | 0.69   | -0.03  | -1.54 | Ba <sub>3</sub> (AsO <sub>4</sub> ) <sub>2</sub> (11.71), MgCO <sub>3</sub> (0.56), FeCO <sub>3</sub> (-5.09), Zn <sub>2</sub> SiO <sub>4</sub> (0.58) |
| S20                  | 1.53      | 1.66    | -2.07  | -12.57     | 7.22     | -0.42  | 0.50   | -0.39 | Al(OH) <sub>3</sub> (-0.30), MgCO <sub>3</sub> (1.05), MnCO <sub>3</sub> (-0.04), Zn <sub>2</sub> SiO <sub>4</sub> (1.70)                              |
| S21                  | 1.49      | 1.63    | -2.07  | -11.67     | 7.31     | -0.38  | 0.52   | -0.54 | Al(OH) <sub>3</sub> (-0.32), MgCO <sub>3</sub> (1.04), Zn <sub>2</sub> SiO <sub>4</sub> (1.44)                                                         |

ND: No detected.
